# Supplementary material
Source: HighWire-hosted journal article supplement (https://jnm.snmjournals.org/highwire/filestream/94216/field_highwire_adjunct_files/0/jnm077578_Supplemental_Figures.pdf)
Supplement: jnm077578_Supplemental_Figures.pdf [file jnm077578_Supplemental_Figures.pdf]

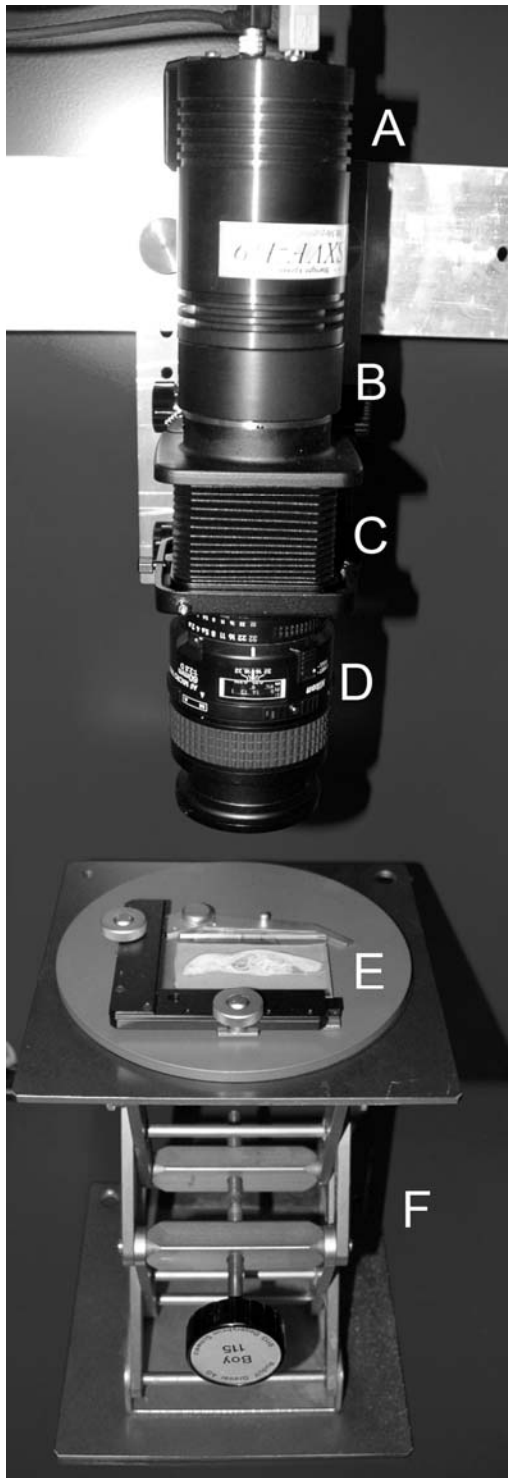

**SUPPLEMENTAL FIGURE 1.** The setup of the Alpha Camera, consisting of (A) CCD-detector; (B) lens adapter; (C) extension bellows; (D) optical lens; (E) glass slide holder; (F) adjustable stand.

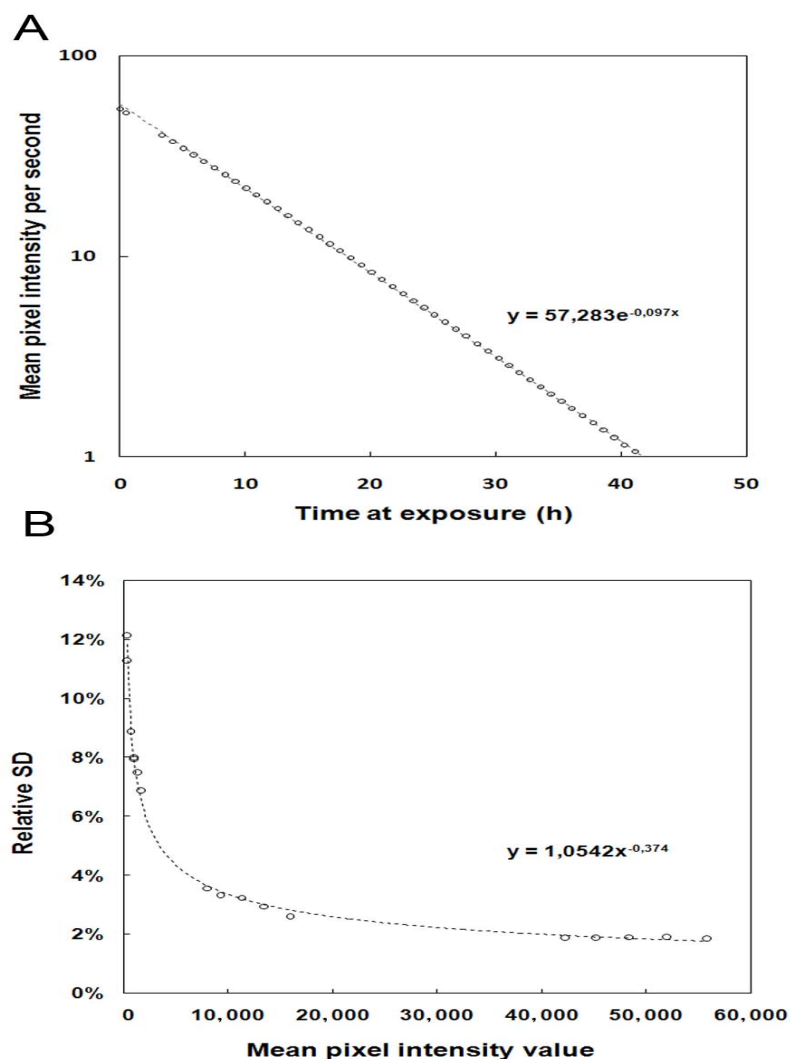

**SUPPLEMENTAL FIGURE 2.** (A) Linearity of the Alpha Camera system. The mean pixel intensity value per second plotted as a function of time for an ROI of a repeated-exposure series of a given decaying  $^{211}\text{At}$  sample. The dashed line represents the exponential fit used to estimate the  $^{211}\text{At}$  half-life. (B) Pixel-to-pixel intensity variation with pixel intensity. Relative standard deviation is plotted as a function of the mean pixel intensity value for an ROI of a repeated-exposure series of a given decaying  $^{211}\text{At}$  plane source.

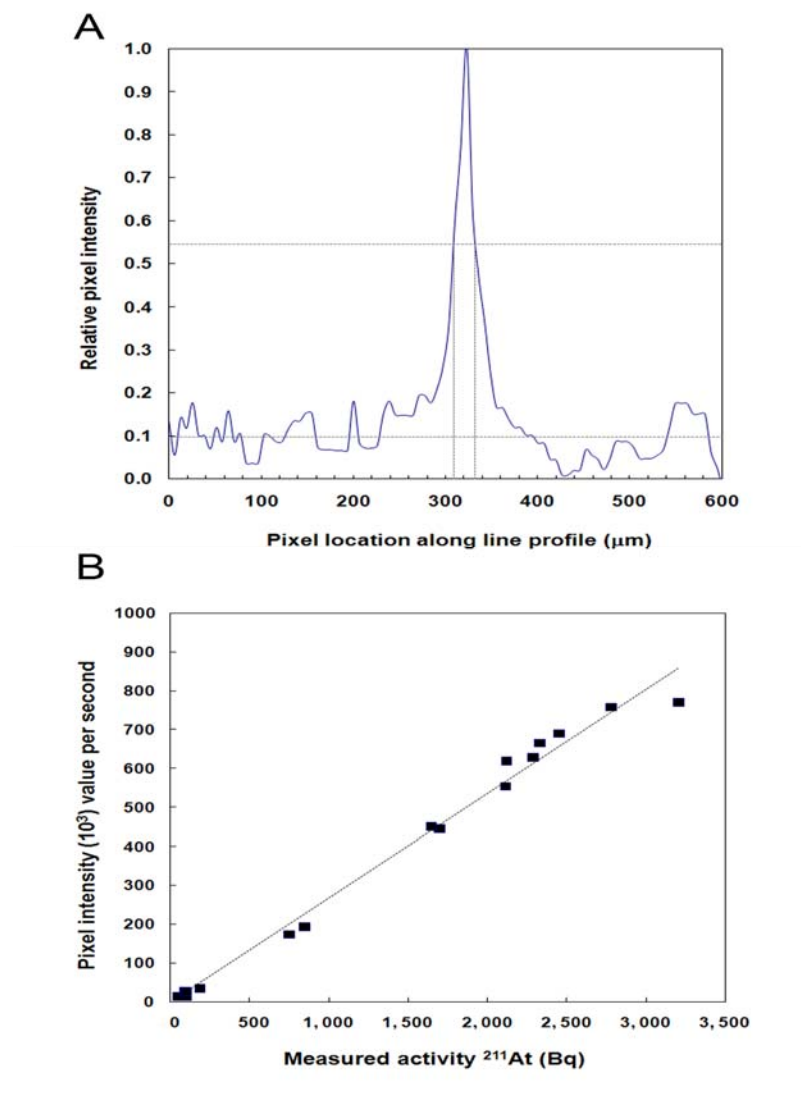

**SUPPLEMENTAL FIGURE 3.** (A) Spatial resolution of the Alpha Camera system. The pixel intensity values along the line profiles of an imaged line source are plotted as a function of pixel location. The dashed lines represent an estimated FWHM of 26  $\mu\text{m}$  for one position along the line source. (B) Pixel intensity in Alpha Camera images of kidney sections (quantified from ROIs) is plotted as a function of the measured  $^{211}\text{At}$  activity in the corresponding sample.

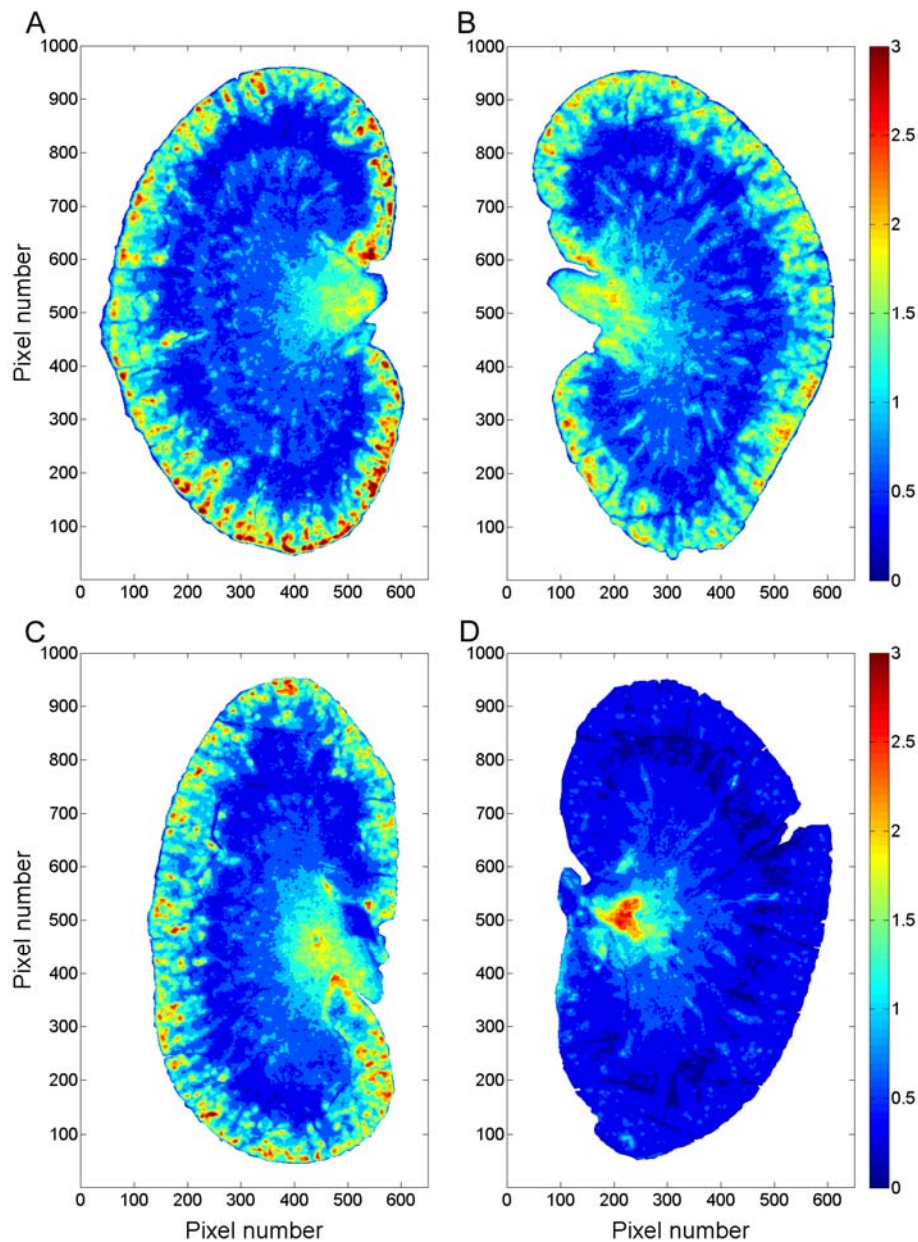

**SUPPLEMENTAL FIGURE 4.** Activity distribution of  $^{211}\text{At-F(ab')}_2$  and  $^{211}\text{At-IgG}$  Trastuzumab in kidneys 20 minutes (A, B) and 2 hours (C, D) after intravenous injection. The left panels (A, C) depict  $^{211}\text{At-MX35-F(ab')}_2$ , while the right panels (B, D) display  $^{211}\text{At-IgG}$  Trastuzumab. Each pixel intensity value was normalized to the mean pixel intensity of the whole kidney. The normalized data were divided into ten bins between 0 and 3.0, and each level was color-coded.
